## 1 **Reverse transcription quantitative PCR to detect low density malaria infections**

2 Peter Christensen,<sup>a,b</sup># Zbynek Bozdech,<sup>c</sup> Wanitda Watthanaworawit,<sup>a</sup> Laurent Renia,<sup>d</sup> Benoit Malleret,<sup>d,e</sup> Clare  
3 Ling,<sup>a,f</sup> Francois Nosten,<sup>a,f</sup>

4 <sup>a</sup>Shoklo Malaria Research Unit, Mahidol-Oxford Tropical Medicine Research Unit, Faculty of Tropical Medicine,  
5 Mahidol University, Maesot, Thailand.

6 <sup>b</sup>Department of Microbiology and Immunology, University of Otago, Dunedin, New Zealand

7 <sup>c</sup>School of Biological Sciences, Nanyang Technological University, Singapore, 637551.

8 <sup>d</sup>Singapore Immunology Network, A\*STAR, Singapore, 138648

9 <sup>e</sup>Department of Microbiology and Immunology, Yong Loo Lin School of Medicine, National University of  
10 Singapore, Singapore, Republic of Singapore

11 <sup>f</sup> Centre for Tropical Medicine and Global Health, Nuffield Department of Medicine, University of Oxford,  
12 Oxford, United Kingdom

13 Running Head: qRT-PCR Detection of Low Density Malaria Infection

14 #Address correspondence to Peter Christensen, [peter.christensen@postgrad.otago.ac.nz](mailto:peter.christensen@postgrad.otago.ac.nz)

15 Zbynek Bozdech and Wanitda Watthanaworawit contributed equally to this work

16

## 17 **Abstract**

18 Targeted malaria elimination strategies require highly sensitive tests to detect low density malaria infections  
19 (LDMI). Commonly used methods for malaria diagnosis such as light microscopy and antigen-based rapid  
20 diagnostic tests (RDTs) are not sensitive enough for reliable identification of infections with parasitaemia  
21 below 200 parasites per milliliter of blood. While targeted malaria elimination efforts on the Thailand-  
22 Myanmar border have successfully used high sample volume ultrasensitive quantitative PCR (uPCR) to  
23 determine malaria prevalence, the necessity for venous collection and processing of large quantities of patient

24 blood limits the widespread tractability of this method. Here we evaluated a real-time quantitative reverse  
25 transcription PCR (qRT-PCR) method that significantly reduces the required sample volume compared to uPCR.  
26 To do this, 304 samples collected from an active case detection program in Kayin state, Myanmar were  
27 compared using uPCR and qRT-PCR. *Plasmodium* spp. qRT-PCR confirmed 18 of 21 uPCR *Plasmodium*  
28 *falciparum* positives, while *P. falciparum* specific qRT-PCR confirmed 17 of the 21 uPCR *P. falciparum* positives.  
29 Combining both qRT-PCR results increased the sensitivity to 100% and specificity was 95.1%. These results  
30 show that malaria detection in areas of low transmission and LDMI, can benefit from the increased sensitivity  
31 of qRT-PCR especially where sample volume is limited.

32

### 33 **Background**

34 As malaria burden reduces globally, the international community is working toward its elimination. Successful  
35 targeted malaria elimination strategies will require increased surveillance and highly sensitive tests capable of  
36 detecting asymptomatic and low density malaria infection (LDMI). These infections are often well below 200  
37 parasites per milliliter and are an important disease reservoir capable of transmitting malaria that must be  
38 detected and eliminated (1, 2). Light microscopy and antigen based rapid diagnostic tests (RDTs) are the most  
39 common tests used in malaria prevalence surveys, and usually assess 5  $\mu$ L of whole blood per test, a volume  
40 which precludes reliable detection of LDMI. Ultrasensitive RDTs improve detection sensitivity of patients with a  
41 parasitaemia between 200 parasites/mL and 10,000 parasites/mL (3), but are still limited by their low input  
42 volume. Molecular methods using the polymerase chain reaction (PCR) remain the only common and reliable  
43 method to detect LDMI. This technique's sensitivity is due to its ability to detect single, specific DNA molecules  
44 and use concentrated DNA from a large sample. Widespread use of PCR based assays, namely real-time  
45 quantitative PCR (qPCR) and reverse-transcription qPCR (qRT-PCR), have revealed a new landscape of malaria  
46 prevalence particularly in low transmission areas (4, 5).

47 The targeted malaria elimination project (TME) on the Eastern Myanmar border used a high blood volume  
48 ultrasensitive qPCR (uPCR) to consistently detect parasitaemia down to 22 parasites per mL (6), and revealed a  
49 high proportion of LDMI (7). Major features of uPCR are its 7 copies of gene target, the high volume of blood  
50 tested and the ability to accurately quantify low density parasitaemia. Although increasing the blood volume of

51 a PCR leads to higher sensitivity (6), the collection of large numbers of high volume samples have their own  
52 specific limitations. These can include, the ethics approval required for venous blood draw, sample logistics,  
53 increased nucleic acid extraction cost and increased sample processing time. Another way to increase the  
54 sensitivity of PCR is to increase the number of specific nucleic acid targets per parasite by targeting specific  
55 RNA and DNA using qRT-PCR. As previously reported by Kamau et al. (8), the primer set used in uPCR can be  
56 made more sensitive by incorporating reverse transcription prior to qPCR, enabling detection of the 7 genes  
57 encoding *Plasmodium* 18S ribosomal nucleic acid (rRNA) and its rRNA transcripts.

58 In this study, we compare the sensitivity and specificity of high sample volume, low target copy number  
59 ultrasensitive qPCRs, with reduced sample volume, high target copy number qRT-PCR for the detection and  
60 quantification of *Plasmodium* spp. and *P. falciparum*.

## 61 **Methods:**

62 We selected 304 samples with previously reported uPCR results: 21 *P. falciparum* positive and 283 *Plasmodium*  
63 spp. negative for comparison to qRT-PCR with increased target numbers per parasite but 30% of the sample  
64 volume.

## 65 **Study area and sample collection**

66 Active case detection samples were collected from rural Eastern Kayin (Karen) state of Myanmar between  
67 2014 and 2015 as part of an international malaria elimination project. Full methods have been published (9),  
68 briefly, 3 ml of blood was drawn into an EDTA container from each adult, and transported on ice to the Shoklo  
69 Malaria Research Unit in Mae Sot, Tak, Thailand. Within 48 hours the samples were processed, and two  
70 aliquots of up to 500  $\mu$ L of packed red blood cells (PRBC) were stored at  $-80^{\circ}\text{C}$ . Only 500  $\mu$ L samples were  
71 accepted for METF qPCR while qRT-PCR included samples with at least 150  $\mu$ L.

## 72 **Ethics Statement**

73 First, community engagement teams sought community approval ahead of the survey date. Then, survey  
74 participants received individual information in their language, and informed consent was obtained from each

75 individual before they provided a venous blood sample. Appropriate treatment for *Plasmodium falciparum* or  
76 *Plasmodium vivax* was available for all RDT-positive individuals.

77 The METF project has ethical approval from the Lower Myanmar Department of Medical Research Ethics'  
78 committee (reference 73/ETHICS2014, dated 25 November 2014, and renewed in November 2015 and 2016  
79 under the same reference).

#### 80 **Ultrasensitive qPCR (uPCR)**

81 DNA was extracted from 500  $\mu$ L of cryopreserved PRBC using QIAamp DNA Blood Midi Kit according to  
82 manufacturer's instructions. The DNA template was then dried in a vacuum concentrator, re-suspended in 10  
83  $\mu$ L of PCR grade water and stored at  $-20^{\circ}\text{C}$  prior to qPCR. Separate uPCRs specific for *Plasmodium* spp., *P.*  
84 *falciparum* and *P. vivax* were performed over 3 years from 2013 as previously described (6). Each 10  $\mu$ L uPCR  
85 reaction contained 2  $\mu$ L of DNA template with 1x QuantiTect Multiplex PCR No ROX mastermix (Qiagen™), 0.4  
86  $\mu$ M each primer, and 0.2  $\mu$ M Taqman probe. Thermal cycling and signal acquisition was done on an ABI 7500  
87 Fast real-time PCR machine with initial denaturation and enzyme activation at  $95^{\circ}\text{C}$  for 15 min, then 50 cycles  
88 of denaturation at  $94^{\circ}\text{C}$  for 15 sec followed by annealing and extension at  $60^{\circ}\text{C}$  for 60 sec. A reaction with  
89 exponential signal increase before cycle 40 was considered positive.

#### 90 **Sample selection, Nucleic acid extraction and qRT-PCR.**

91 Within 3 years of sample storage at  $-80^{\circ}\text{C}$ , nucleic acid extraction and qRT-PCR assays were done on the  
92 second aliquot of PRBC for selected samples: 21 uPCR *P. falciparum* positives and 283 uPCR negatives.

93 Nucleic acid was extracted using Quick-RNA Miniprep (Plus) kits from Zymo Research. Manufacturer's  
94 instructions for whole blood were followed with minor changes. These include, extraction from 150  $\mu$ L of  
95 white blood cell depleted PRBC in phosphate buffered saline (PBS) up to 200  $\mu$ L instead of 200  $\mu$ L of whole  
96 blood, DNase enzyme wasn't used, and RNA was eluted in 20  $\mu$ L of molecular grade water. Two qRT-PCRs were  
97 done on each extract in duplicate: the *Plasmodium* spp. specific assay using the same primer and probe set as  
98 uPCR, and a *P. falciparum* specific set targeting the DNA of the A-18S rRNA genes and its rRNA transcripts (5).  
99 Both reactions had a final volume of 15  $\mu$ L and contained 4  $\mu$ L of RNA template, 1x Superscript III One-Step RT-  
100 PCR System master mix (ThermoFisher Scientific™), 0.4  $\mu$ M forward and reverse oligo primer and 0.2  $\mu$ M of

101 MGB Taqman probe. Amplification and signal acquisition were done on an ABI 7500 Fast real-time PCR  
102 machine with cycling conditions as follows: reverse transcription at 45°C for 30 min, enzyme activation at 95°C  
103 for 2 min, followed by 50 cycles of denaturation at 95°C for 15 sec and combined annealing and extension  
104 steps at 60°C for 60 sec. A reaction with exponential signal increase before cycle 40 was considered positive.

## 105 **Standard Curve**

106 Standard reference curves for the qRT-PCR and uPCR were made using aliquots of 10,000 flow cytometry  
107 sorted small ring stage *P. falciparum* (3D7) parasites (10). The method used to extract the nucleic acids from  
108 these parasites depended on the assay used (qRT-PCR or uPCR). For the uPCR standard curve, Qiagen DNA  
109 Blood Mini Kit was used to extract DNA, this was eluted in 200 µL of sterile water, dried in a partial vacuum at  
110 30°C for consistency with sample extraction, and re-suspended in 200 µL of Qiagen AE buffer (6). Nucleic acid  
111 for the qRT-PCR standard curve was extracted using the Zymo Quick-RNA Miniprep (Plus) kit as above but  
112 eluted in 40 µL of water. Serial one in five dilutions were made with these extracts to make 7 standards. The  
113 uPCR standard curve ranged from 100 to 0.032 parasites per qPCR reaction and the qRT-PCR standard curve  
114 ranged from 1000 parasites to 0.064 parasites per reaction.

## 115 **Analysis**

116 *Plasmodium* spp and *P. falciparum* qRT-PCR results were analysed using 2 x 2 contingency tables with uPCR as  
117 gold standard. Results of both qRT-PCRs were also combined and compared to uPCR, where a positive test by  
118 at least one qRT-PCR was considered positive.

119

## 120 **Results**

### 121 ***Plasmodium* spp. qRT-PCR:**

122 *Plasmodium* spp. qRT-PCR confirmed 18 of 21 *Plasmodium* spp. uPCR positives and an additional 9 positive  
123 reactions from the 283 uPCR negatives. The sensitivity and specificity of *Plasmodium* spp. qRT-PCR was 85.7%  
124 and 96.8% respectively when compared to uPCR (Table 1). The positive predictive value (PPV) and negative  
125 predictive value (NPV) of this test was 66.7% and 98.9% respectively.

126 ***P. falciparum* qRT-PCR:**

127 Using the *P. falciparum* specific qRT-PCR, 16 of the 21 uPCR *P. falciparum* positives were confirmed along with  
128 5 extra positives from the 283 negatives. Sensitivity and specificity of this test was 76.2% and 98.2%  
129 respectively when compared to uPCR (Table 1). PPV for this PCR was 76.2% and NPV was 98.2%.

130 **Combined *Plasmodium* spp. and *P. falciparum* qRT-PCR:**

131 Combining the results of both *Plasmodium* spp. and *P. falciparum* qRT-PCRs, all 21 uPCR positives are  
132 confirmed positive (100% Sensitivity) with 14 false positives (specificity 95.1%) (Table 1). These combined  
133 results gave a PPV of 60% and a NPV of 100%.

134 **Quantification**

135 The quantification by each method gave highly varied results. Repeated measures one way analysis of variance  
136 with post hoc analysis using Tukey's multiple comparison test revealed no significance between parasitaemia  
137 counts of each PCR technique (Figure 1).

138

139 **Discussion**

140 LDMI detection is essential for effective targeted elimination programs, necessitating the careful selection of a  
141 detection assay that is appropriate to the setting and study requirements. Sample volume, storage conditions  
142 and transit time are important factors, as well as the required assay sensitivity, specificity and its cost. RNA is  
143 generally less stable than DNA, and accurate RNA quantification often requires normalization due to variable  
144 transcription rates. It is for these reasons that DNA based qPCR was chosen for the original study as this  
145 approach enabled accurate quantification of LDMI in a setting where samples from remote locations would  
146 likely experience delays.

147 The targeted malaria elimination (TME) project on the Eastern Myanmar border used conserved regions of the  
148 18S rRNA genes as the target for qPCR. This high sample volume uPCR assay was modified from the qRT-PCR  
149 published by Kamau et al. 2011 for their detection of low density malaria infections (LDMI). After uPCR

150 detected a high prevalence of LDMI in the region (9), and with continued surveillance in mind, we wanted a  
151 lower sample volume assay with similar LDMI detection sensitivity. As Kamau et al. has shown, using this  
152 primer set as a qRT-PCR significantly increases the sensitivity of the assay. The increased sensitivity of qRT-PCR  
153 is due to the increased number of targets per parasite (compared to uPCR). These amplification targets include  
154 the 18S rRNA genes, and the structural RNA of each ribosome. *Plasmodium* genus specific uPCR amplifies type  
155 A and S 18S ribosomal RNA genes distributed on chromosomes 1, 5, 7, 11 and 13. A positive qPCR reaction  
156 requires at least one of these genes to be included in the assay. Alternatively, qRT-PCR can detect these gene  
157 loci, and their gene transcripts (rRNA). The increased target copy number per parasite means a smaller fraction  
158 of parasite is needed to provide a positive reaction, leading to less false negatives and an opportunity for  
159 further downstream applications. The downside to increased sensitivity and target copy is the variable nature  
160 of gene expression and relative fragility of RNA molecules. In general this makes accurate quantification of  
161 parasitaemia by qRT-PCR more challenging, and is one of the reasons our inter-assay quantifications were not  
162 significantly similar.

163 Another reason our quantifications were not similar is variation in original frozen sample volume, which was  
164 not recorded in this study. Because qRT-PCR targeting rRNA is capable of detecting tiny fractions of a single  
165 parasite, the original lysed sample volume becomes an important detail. Assuming a single freeze thaw lyses  
166 blood stage *Plasmodium* and a *Plasmodium* assay has a hundred thousand targets per parasite, then a single  
167 lysed parasite divided into one hundred aliquots, can produce one hundred positive reactions, if the parasite  
168 wasn't lysed beforehand then only 1 of 100 would be positive. This can lead to people describing their assay  
169 sensitivity well below the sample volume used, a theoretical impossibility unless detecting free circulating  
170 nucleic acids outside of parasite cells.

171 Alternatively, LDMI detection relying on DNA, will have a significant reduction in sensitivity if only a fraction of  
172 the DNA template is tested. This is exemplified by the lowest concentration standard used for quantification in  
173 uPCR. This standard theoretically contains 0.032 parasites per PCR reaction, at this concentration there is a 1 in  
174 5 chance for the reaction to be positive (7 target genes per parasite x 0.032 = 0.2 copies per reaction). These  
175 factors need to be considered when setting up a qPCR standard curve for LDMI quantification. A reliable  
176 standard curve for qPCR requires at least one copy of its target at the lowest concentration. In conclusion, the  
177 success of any LDMI detection protocol relies on the careful consideration of the following factors: sample

178 volume, elution volume, template volume per assay reaction, primer set target and assay type (uPCR or qRT-  
179 PCR). Our experience of the different types of assay suggest that for a LDMI program requiring highly sensitive,  
180 accurate quantification and where venous blood collection is possible, uPCR is recommended. In an  
181 environment where blood volume is limited (i.e. finger prick sampling) and quantification accuracy of  
182 parasitaemia is less important, qRT-PCR is a suitable alternative capable of detecting a single parasite in a given  
183 sample volume.

## 184 **Acknowledgements**

185 The authors would like to thank the staff and patients attending clinics associated with the Shoklo Malaria  
186 Research Unit, Tak Province, Thailand. This study was supported by, the Wellcome Trust as part of  
187 the WT101148MA strategic award “Eliminating malaria to counter artemisinin resistance.” Funding was also  
188 obtained from the following sources; the Bill and Melinda Gates Foundation; The Singapore Immunology  
189 Network, A\*STAR core fund; the NUHS start-up funding (NUHSRO/2018/006/SU/01); NUHS seed fund  
190 (NUHSRO/2018/094/T1); the Wellcome Trust Mahidol University Oxford Tropical Medicine Research  
191 Programme and the New Zealand HRC eASIA (17/678) project grant.

## 192 **Conflict of interest**

193 We declare that we have no conflicts of interest.

## 194 **References**

- 195 1. Sturrock HJ, Hsiang MS, Cohen JM, Smith DL, Greenhouse B, Bousema T, Gosling RD. 2013.  
196 Targeting asymptomatic malaria infections: active surveillance in control and elimination.  
197 PLoS Med 10:e1001467.
- 198 2. Okell LC, Bousema T, Griffin JT, Ouedraogo AL, Ghani AC, Drakeley CJ. 2012. Factors  
199 determining the occurrence of submicroscopic malaria infections and their relevance for  
200 control. Nature Communications 3.
- 201 3. Landier J, Haohankhunnatham W, Das S, Konghahong K, Christensen P, Raksuansak J,  
202 Phattharakokoedbun P, Kajeewiwa L, Thwin MM, Jang IK, Imwong M, Wiladphaingern J,



- 203 Lwin KM, Ling C, Proux S, Domingo GJ, Delmas G, Nosten FH. 2018. Operational Performance  
204 of a Plasmodium falciparum Ultrasensitive Rapid Diagnostic Test for Detection of  
205 Asymptomatic Infections in Eastern Myanmar. *J Clin Microbiol* 56.
- 206 4. Parker DM, Landier J, Thu AM, Lwin KM, Delmas G, Nosten FH, Malaria Elimination Task  
207 Force G. 2017. Scale up of a Plasmodium falciparum elimination program and surveillance  
208 system in Kayin State, Myanmar. *Wellcome Open Res* 2:98.
- 209 5. Sumari D, Mugasa J, Selemani M, Shekalaghe S, Mugittu K, Gwakisa P. 2016. Prevalence of  
210 submicroscopic Plasmodium falciparum infections in asymptomatic children in low  
211 transmission settings in Bagamoyo, Tanzania. *MWJ* 7.
- 212 6. Imwong M, Hanchana S, Malleret B, Renia L, Day NP, Dondorp A, Nosten F, Snounou G,  
213 White NJ. 2014. High-throughput ultrasensitive molecular techniques for quantifying low-  
214 density malaria parasitemias. *J Clin Microbiol* 52:3303-9.
- 215 7. von Seidlein L, Peto TJ, Landier J, Nguyen TN, Tripura R, Phommasone K, Pongvongsa T, Lwin  
216 KM, Keereecharoen L, Kajeewiwa L, Thwin MM, Parker DM, Wiladphaingern J, Nosten S,  
217 Proux S, Corbel V, Tuong-Vy N, Phuc-Nhi TL, Son DH, Huong-Thu PN, Tuyen NTK, Tien NT,  
218 Dong LT, Hue DV, Quang HH, Nguon C, Davoeung C, Rekol H, Adhikari B, Henriques G,  
219 Phongmany P, Suangkanarat P, Jeeyapant A, Vihokhern B, van der Pluijm RW, Lubell Y, White  
220 LJ, Aguas R, Promnarate C, Sirithiranont P, Malleret B, Renia L, Onsjo C, Chan XH, Chalk J,  
221 Miotto O, Patumrat K, Chotivanich K, Hanboonkunupakarn B, Jittmala P, et al. 2019. The  
222 impact of targeted malaria elimination with mass drug administrations on falciparum  
223 malaria in Southeast Asia: A cluster randomised trial. *PLoS Med* 16:e1002745.
- 224 8. Kamau E, Tolbert LS, Kortepeter L, Pratt M, Nyakoe N, Muringo L, Ogutu B, Waitumbi JN,  
225 Ockenhouse CF. 2011. Development of a highly sensitive genus-specific quantitative reverse  
226 transcriptase real-time PCR assay for detection and quantitation of plasmodium by  
227 amplifying RNA and DNA of the 18S rRNA genes. *J Clin Microbiol* 49:2946-53.

- 228 9. Landier J, Kajeewiwa L, Thwin MM, Parker DM, Chaumeau V, Wiladphaingern J, Imwong M,  
229 Miotto O, Patumrat K, Duanguppama J, Cerqueira D, Malleret B, Renia L, Nosten S, von  
230 Seidlein L, Ling C, Proux S, Corbel V, Simpson JA, Dondorp AM, White NJ, Nosten FH. 2017.  
231 Safety and effectiveness of mass drug administration to accelerate elimination of  
232 artemisinin-resistant falciparum malaria: A pilot trial in four villages of Eastern Myanmar.  
233 Wellcome Open Res 2:81.
- 234 10. Malleret B, Claser C, Ong AS, Suwanarusk R, Sriprawat K, Howland SW, Russell B, Nosten F,  
235 Renia L. 2011. A rapid and robust tri-color flow cytometry assay for monitoring malaria  
236 parasite development. Sci Rep 1:118.
- 237

238 **Figure Legend**

239 **Figure 1.** Parasite quantification by spp. uPCR, spp. RT-qPCR and Pf RT-qPCR. Quantification of  
240 parasitaemia from three PCRs on 21 uPCR positives from the TME malaria survey of Kayin state,  
241 Myanmar. Parasitaemia by uPCR ranged from 17 to  $9.91 \times 10^6$  parasites per mL whole blood. One-way  
242 ANOVA with multiple comparisons revealed no significance between quantification results.

|                                | Positive | Negative | False Positive | False Negative | Sensitivity | Specificity |
|--------------------------------|----------|----------|----------------|----------------|-------------|-------------|
| <i>Plasmodium spp.</i> uPCR    | 21       | 283      | N/A            | N/A            | N/A         | N/A         |
| <i>Plasmodium spp.</i> qRT-PCR | 27       | 277      | 9              | 3              | 85.7%       | 96.8%       |
| <i>P. falciparum</i> qRT-PCR   | 21       | 283      | 5              | 5              | 76.2%       | 98.2%       |
| Combined qRT-PCR               | 35       | 269      | 14             | 0              | 100%        | 95.1%       |

**Table 1.** Results of three PCRs on 304 malaria survey samples: tabulated results from *Plasmodium spp.* uPCR, *Plasmodium spp.* RT-qPCR and *P. falciparum* RT-qPCR including total positives, total negatives, false positives, false negatives, sensitivity and specificity using *Plasmodium spp.* uPCR results as gold standard.

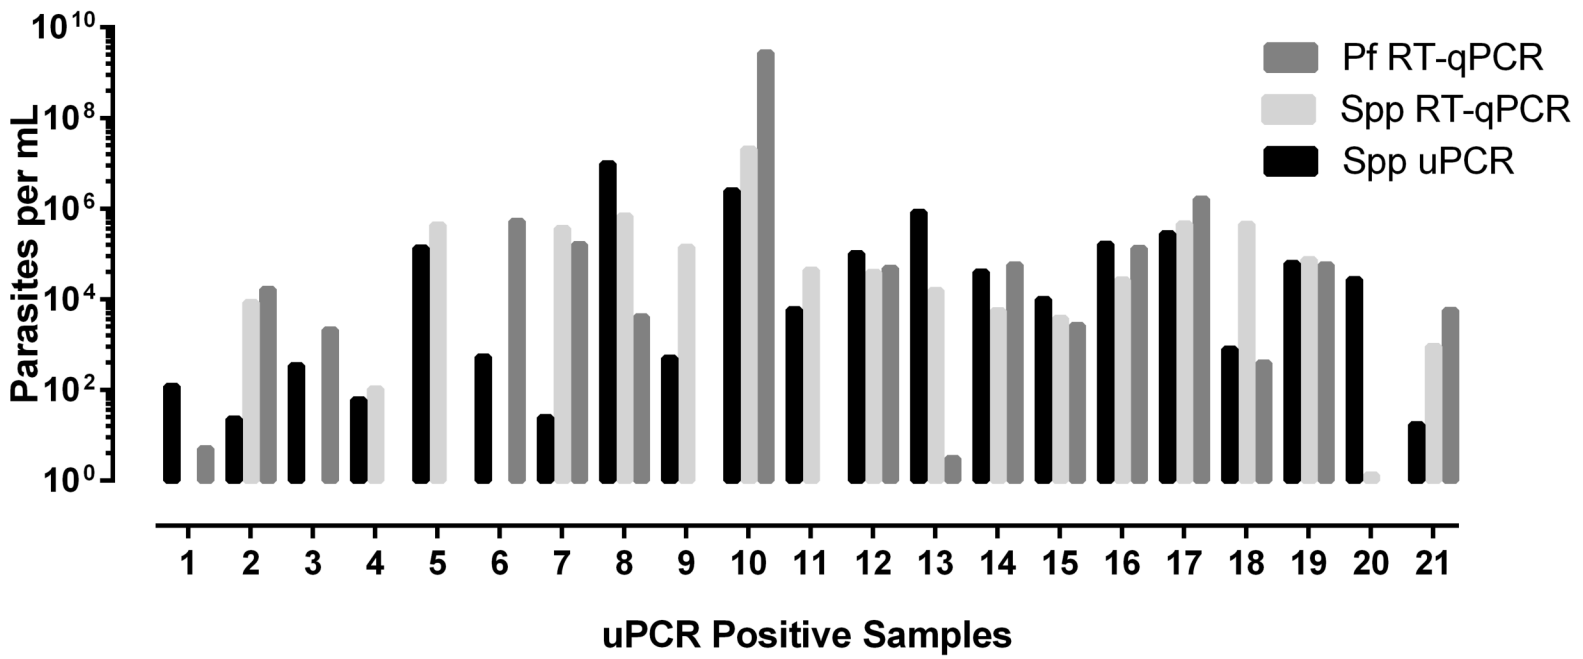

Source: https://www.biorxiv.org/content/10.1101/2020.07.01.183491v1.full.pdf
